# Supplementary material for: Dynamic mode decomposition of inertial particle caustics in Taylor–Green flow
Source: Springer Nature journal article supplement (doi:10.1038/s41598-021-89953-3), 2021-05-17
Supplement: MOESM1 [file 41598_2021_89953_MOESM1_ESM.pdf]

## ***Supplementary material***

### **Dynamic Mode Decomposition of inertial particle caustics in Taylor-Green flow**

**Omstavan Samant<sup>1</sup>, Jaya Kumar Alageshan<sup>2,\*</sup>, Sarveshwar Sharma<sup>3</sup>, and Animesh Kuley<sup>2</sup>**

<sup>1</sup> Centre for Fusion, Space and Astrophysics, University of Warwick, Coventry, CV4 7AL, UK.

<sup>2</sup> Department of Physics, Indian Institute of Science, Bangalore, India - 560012.

<sup>3</sup> Institute For Plasma Research, Gandhinagar, Gujarat, India - 382428.

\* [jkumar.res@gmail.com](mailto:jkumar.res@gmail.com)

The supplemental material contains two videos. The caption corresponding to each of the videos are given below:

#### **C.1: Vid1.mp4**

*Caption:* The video shows the evolution of  $St=1$  inertial particles in a Taylor-Green flow. The colormap in the background represents the strength of the vorticity field. Figure. 1 in the manuscript shows a snapshot of the particle distribution at  $t = 750 \Delta t$ .

#### **C.2: Vid2.mp4**

*Caption:* To demonstrate the correlation between the particle caustics and the DMD, we overlay the evolution of particles on top of the DMD obtained for a bi-disperse system. Notice that at 650<sup>th</sup> iteration the caustic front and the DMD fronts match.
